# Supplementary material for: Rare spontaneous monochorionic dizygotic twins: a case report and a systematic review
Source: Springer Nature journal article supplement (doi:10.1186/s12884-022-04866-x), 2022-07-14

## **Rare spontaneous monochorionic dizygotic twins: a case report and a systematic review.**

**January 14<sup>th</sup> 2022**

### **Pubmed**

354 articles

*(monochorionic AND dizygotic AND twins; OR monochorionic AND dizygotic AND chimerism; OR monochorionic AND dizygotic AND freemartinism; OR monochorionic AND dizygotic AND spontaneous; OR monochorionic AND heterosexual AND spontaneous)*

### **Scopus**

367 articles

*(monochorionic AND dizygotic AND twins; OR monochorionic AND dizygotic AND chimerism; OR monochorionic AND dizygotic AND freemartinism; OR monochorionic AND dizygotic AND spontaneous, OR monochorionic AND heterosexual AND spontaneous)*

### **Ovid**

62 articles

*(monochorionic AND dizygotic AND twins; OR monochorionic AND dizygotic AND chimerism; OR monochorionic AND dizygotic AND freemartinism; OR monochorionic AND dizygotic AND spontaneous, OR monochorionic AND heterosexual AND spontaneous)*

Supplementary figure S1 – Flow diagram of inclusion of articles

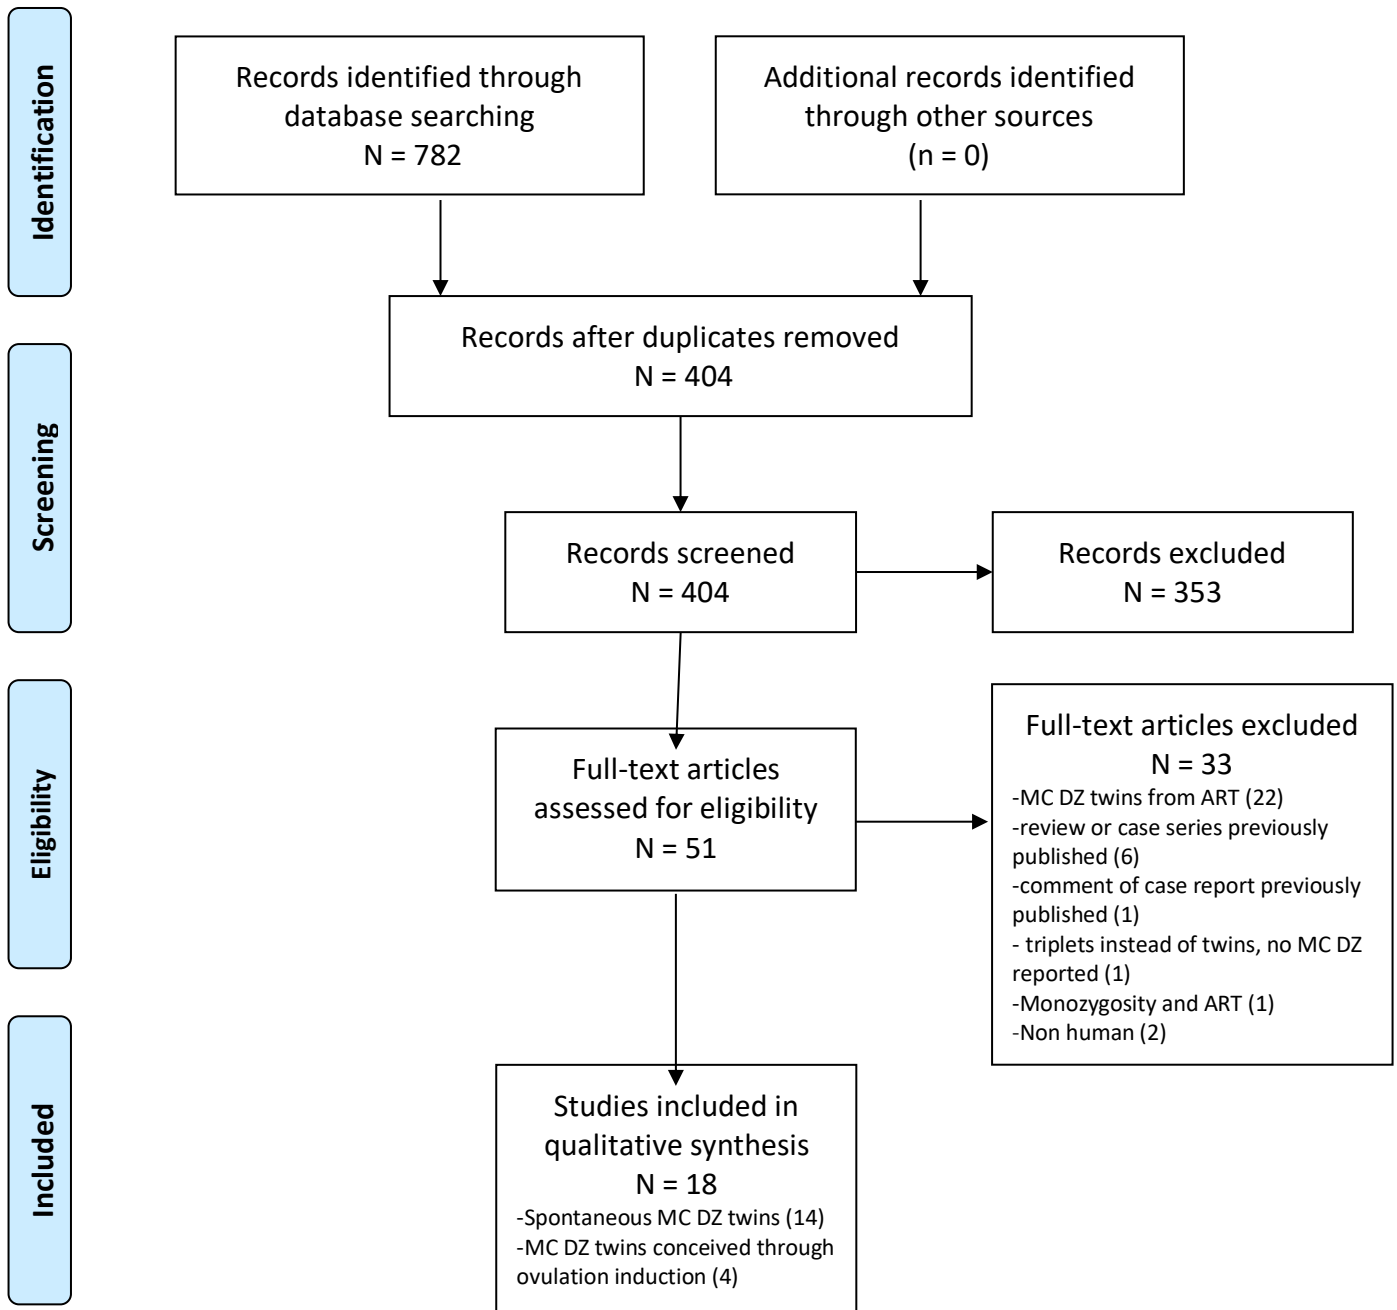

Supplement: MOESM1 [file 23268370]
